# Supplementary material for: Efficacy of BRAF and MEK Inhibition in Patients with BRAF-Mutant Advanced Melanoma and Germline CDKN2A Pathogenic Variants
Source: MDPI journal article supplement (doi:10.3390/cancers13102440), 2021-05-18
Supplement: s1 [file s1]

**Supplementary Table 1.** Individualized data for the cohort of patients with germline *CDKN2A* pathogenic variants and *BRAF* V600 mutated metastatic melanoma treated with BRAF and MEK inhibitors included in our study.

| ID   | Region    | Sex | Germline <i>CDKN2A</i> variant | Age at Tx start | AJCC 8 <sup>th</sup> ed. | Baseline LDH | Treatment                                                     | Response | PFS * | OS* | Censor Date | Alive at censor Date | G3-4 AEs |
|------|-----------|-----|--------------------------------|-----------------|--------------------------|--------------|---------------------------------------------------------------|----------|-------|-----|-------------|----------------------|----------|
| ST2  | Sweden    | F   | p.Pro81Ser                     | 62              | M1c                      | Normal       | Dabra+Tram                                                    | PR       | 23    | 27+ | Feb 2018    | YES                  | NO       |
| GO2  | Sweden    | M   | p.Arg112dup                    | 34              | M1c                      | NA           | Encor+Bini                                                    | PR       | 9     | 10  | Mar 2016    | NO                   | NO       |
| BCN1 | Barcelona | M   | p.Gly101Trp                    | 67              | M1d                      | NA           | Dabrafenib                                                    | PR       | 30    | 30  | 29/10/2013  | NO                   | NO       |
| BCN2 | Barcelona | F   | c.106delG                      | 68              | M1c                      | NA           | Dabra+Tram                                                    | PR       | 11+   | 11+ | 06/01/2018  | YES                  | NO       |
| BCN3 | Barcelona | F   | c.-34G>T (homozygous)          | 43              | M1d                      | NA           | Dabra+Tram                                                    | PR       | 3     | 5   | 04/01/2018  | NO                   | NO       |
| BCN4 | Barcelona | F   | p.Arg124Cys                    | 64              | M1c                      | NA           | Dabra+Tram+PDR001 (double blind clinical assay: CPDR001F2301) | PR       | 4     | 4+  | 15/01/2018  | YES                  | NO       |
| LE1  | Leiden    | M   | 19bp del                       | 46              | M1a                      | NA           | Dabra+Tram                                                    | PR       | 3     | 4+  | Jul 2017    | YES                  | NO       |
| LE2  | Leiden    | M   | 19bp del                       | 62              | M1c                      | NA           | Vemurafenib                                                   | PR       | 3     | 4   | Apr 2012    | NO                   | NO       |
| LE3  | Leiden    | M   | 19bp del                       | 29              | M1d                      | NA           | Dabrafenib                                                    | PR       | 2     | 25+ | Jul 2017    | YES                  | YES      |
| GE2  | Genoa     | F   | G101W                          | 57              | M1c                      | Elevated     | Dabra+Tram                                                    | PR       | 12    | 16  | Oct 2016    | NO                   | NO       |
| GE3  | Genoa     | M   | S56I                           | 54              | M1c                      | Elevated     | Vemurafenib                                                   | PD       | 2     | 5   | Sep 2015    | NO                   | NO       |
| GE6  | Genoa     | M   | M1R                            | 49              | M1a                      | Normal       | Dabra+Tram                                                    | PR       | 30+   | 30+ | Aug 2019    | YES                  | NO       |
| GE8  | Genoa     | F   | G101W                          | 54              | M1c                      | Elevated     | Vemurafenib                                                   | PD       | 2     | 17  | Apr 2016    | NO                   | NO       |

|      |       |   |       |    |     |          |             |    |     |     |          |     |    |
|------|-------|---|-------|----|-----|----------|-------------|----|-----|-----|----------|-----|----|
| GE9  | Genoa | F | G101W | 69 | M1c | NA       | Vemurafenib | SD | 6   | 13  | Jun 2015 | NO  | NO |
| GE10 | Genoa | F | A68L  | 59 | M1c | Elevated | Encor+Bini  | PR | 10  | 16  | Mar 2017 | NO  | NO |
| GE11 | Genoa | M | F90S  | 49 | M1b | NA       | Vemurafenib | PR | 5   | 19  | Mar 2015 | NO  | NO |
| GE12 | Genoa | M | F90S  | 52 | M1c | Elevated | Dabra+Tram  | PR | 5   | 9   | Mar 2019 | NO  | NO |
| GE13 | Genoa | M | E27X  | 69 | M1d | Normal   | Dabra+Tram  | PR | 9   | 19  | May 2019 | NO  | NO |
| GE14 | Genoa | F | G101W | 60 | M1d | Elevated | Dabra+Tram  | PR | 12+ | 12+ | Sep 2019 | YES | NO |

---

Abbreviations: Bini= binimetinib; Dabra= dabrafenib; Encor= encorafenib; NA= not available; Tram= trametinib. \*Survival rates with + prefix indicates that patient still has an ongoing PFS or OS

**Supplementary Table 2.** Summary of data from phase 3 clinical trials on patients with metastatic melanoma treated with BRAF and MEK inhibitors.

| Study                                           | BRIM-3[1, 2]<br>N= 337 | BREAK-3[3]<br>N=187 | COBRIM[4]<br>N=247      | COMBI-d/COMBI-<br>v[5]<br>N= 563 | COLUMBUS[6]<br>N=192             |
|-------------------------------------------------|------------------------|---------------------|-------------------------|----------------------------------|----------------------------------|
| <b>Treatment</b>                                | Vemurafenib            | Dabrafenib          | Vemurafenib+cobimetinib | Dabrafenib+trametinib            | Encorafenib+binimetinib          |
| <b>Previous treatments</b>                      | Untreated              | Untreated           | Untreated               | Untreated                        | Untreated and previously treated |
| <b>Age, years</b>                               |                        |                     |                         |                                  |                                  |
| <b>Median (range) [IQR]</b>                     | 56[ 47–65]             | 53 (22–93)          | 56 (23–88)              | 55 (22–89)/ 55 (18–91)           | 57 [20–89]                       |
| <b>AJCC 7<sup>th</sup> edition stage, N (%)</b> |                        |                     |                         |                                  |                                  |
| M0                                              | 20 (6%)                | 6 (3%)              | 21 (9%)                 | 19 (3%)                          | 9 (5%)                           |
| M1a                                             | 34 (10%)               | 23 (12%)            | 40 (16%)                | 75 (13%)                         | 26 (14%)                         |
| M1b                                             | 62 (18%)               | 34 (18%)            | 40 (16%)                | 105 (19%)                        | 34 (18%)                         |
| M1c                                             | 221 (66%)              | 124 (66%)           | 146 (59%)               | 363 (64%)                        | 123 (64%)                        |
| <b>Baseline LDH, N (%)</b>                      |                        |                     |                         |                                  |                                  |
| Normal                                          | 142 (42%)              | 119 (64%)           | Not reported            | 365 (65%)                        | 137 (71%)                        |
| Elevated                                        | 195 (58%)              | 67 (36%)            | 112 (46%)               | 194 (34%)                        | 55 (29%)                         |
| Unknown                                         | 0 (0%)                 | 1 (<1%)             | Not reported            | 4 (1%)                           | 0 (0%)                           |
| <b>Overall Response, N (%)</b>                  |                        |                     |                         |                                  |                                  |
| CR                                              | 19 (6%)                | 6 (3%)              | 39 (16%)                | 109 (19%)                        | 37 (19%)                         |
| PR                                              | 173 (51%)              | 87 (47%)            | 133 (54%)               | 274 (49%)                        | 108 (56%)                        |
| SD                                              | Not reported           | 78 (42%)            | 44 (18%)                | 130 (23%)                        | 33 (17%)                         |
| PD                                              | Not reported           | 10 (5%)             | 19 (8%)                 | 31 (6%)                          | 14 (7%)                          |

|                                         |              |            |             |             |             |
|-----------------------------------------|--------------|------------|-------------|-------------|-------------|
| Not evaluable                           | Not reported | 6 (3%)     | 12 (5%)     | 17 (3%)     | 0 (0%)      |
| <b>Median progression-free survival</b> | 6.9 months   | 5.1 months | 12.3 months | 11.1 months | 14.9 months |

Abbreviations: IQR= interquartile range

**Supplementary Table 3.** Summary of data from “real world” studies of patients with metastatic melanoma treated with BRAF and MEK inhibitors.

| Study                                    | Vemurafenib safety study[7, 8]   | Vemurafenib safety study (subanalysis of Italian population)[9] | Describe I[10]                   | Compassionate use of dabrafenib (retrospective analysis of Spanish population)[11] | Describe II[12]       | Compassionate use of dabrafenib+trametinib (retrospective analysis of Spanish population)[11] |
|------------------------------------------|----------------------------------|-----------------------------------------------------------------|----------------------------------|------------------------------------------------------------------------------------|-----------------------|-----------------------------------------------------------------------------------------------|
| <b>Number of patients</b>                | 3219                             | 385                                                             | 331                              | 49                                                                                 | 162*                  | 87                                                                                            |
| <b>Treatment</b>                         | Vemurafenib                      | Vemurafenib                                                     | Dabrafenib                       | Dabrafenib                                                                         | Dabrafenib+trametinib | Dabrafenib+trametinib                                                                         |
| <b>Previous treatments</b>               | Untreated and previously treated | Untreated and previously treated                                | Untreated and previously treated | Untreated and previously treated                                                   | b<br>Untreated        | Untreated and previously treated                                                              |
| <b>Age, years</b>                        |                                  |                                                                 |                                  |                                                                                    |                       |                                                                                               |
| <b>Median (range) [IQR]</b>              | 55 (13-95)                       | NA                                                              | 58 (18–86)                       | 56.8 [26.2–84.3]                                                                   | 55.5 (22–87)          | 53.2 (24.8–81.3)                                                                              |
| <b>AJCC 7<sup>th</sup> edition stage</b> |                                  |                                                                 |                                  |                                                                                    |                       |                                                                                               |
| M0                                       | 49 (2%)                          | 4 (1%)                                                          | 14 (4%)                          | 6 (12%)                                                                            | 14 (9%)               | 0 (0%)                                                                                        |
| M1a                                      | 270 (8%)                         | 48 (12%)                                                        | Not reported                     | 7 (14%)                                                                            | Not reported          | 12 (14%)                                                                                      |
| M1b                                      | 336 (10%)                        | 53 (14%)                                                        | Not reported                     | 8 (16%)                                                                            | Not reported          | 19 (22%)                                                                                      |
| M1c                                      | 2562 (80%)                       | 280 (73%)                                                       | Not reported                     | 28 (57%)                                                                           | Not reported          | 56 (64%)                                                                                      |
| <b>Brain metastases, n (%)</b>           | 753 (23%)                        | 83 (22%)                                                        | 132 (40%)                        | Not reported                                                                       | 62 (38%)              | Not reported                                                                                  |
| <b>Baseline LDH, n (%)</b>               |                                  | Not reported                                                    | Not reported                     | Not reported                                                                       | Not reported          | Not reported                                                                                  |

|                                         |            |            |            |              |            |              |
|-----------------------------------------|------------|------------|------------|--------------|------------|--------------|
| Normal                                  | 1508 (47%) |            |            |              |            |              |
| Elevated                                | 1625 (50%) |            |            |              |            |              |
| Unknown                                 | 86 (3%)    |            |            |              |            |              |
| <b>Overall Response, n (%)</b>          |            |            |            |              |            |              |
| CR                                      | 125 (5%)   | 14 (4%)    | 23 (7%)    | 7 (15%)      | 21 (13%)   | 18 (21%)     |
| PR                                      | 865 (32%)  | 87 (26%)   | 129 (39%)  | 21 (45%)     | 88 (54%)   | 43 (51%)     |
| SD                                      | 1399 (51%) | 181 (54%)  | 67 (20%)   | 14 (29%)     | 20 (12%)   | 14 (17%)     |
| PD                                      | 339 (12%)  | 43 (13%)   | 98 (30%)   | 5 (11%)      | 27 (17%)   | 9 (11%)      |
| Not evaluable                           | 9 (<1%)    | 7 (2%)     | 14 (4%)    | Not reported | 6 (4%)     | Not reported |
| <b>Median progression-free survival</b> | 5.6 months | 5.9 months | 5.2 months | 8.1 months   | 7.5 months | 10.2 months  |

---

\*BRAF-inhibitor naive population only

## References

- 1 McArthur GA, Chapman PB, Robert C, Larkin J, Haanen JB, Dummer R, Ribas A, Hogg D, Hamid O, Ascierto PA, Garbe C, Testori A, Maio M, Lorigan P, Lebbé C, Jouary T, Schadendorf D, O'Day SJ, Kirkwood JM, Eggermont AM, Dréno B, Sosman JA, Flaherty KT, Yin M, Caro I, Cheng S, Trunzer K, Hauschild A. Safety and efficacy of vemurafenib in BRAF(V600E) and BRAF(V600K) mutation-positive melanoma (BRIM-3): extended follow-up of a phase 3, randomised, open-label study. *The Lancet Oncology* 2014;**15**:323–332.
- 2 Chapman PB, Robert C, Larkin J, Haanen JB, Ribas A, Hogg D, Hamid O, Ascierto PA, Testori A, Lorigan PC, Dummer R, Sosman JA, Flaherty KT, Chang I, Coleman S, Caro I, Hauschild A, McArthur GA. Vemurafenib in patients with BRAFV600 mutation-positive metastatic melanoma: final overall survival results of the randomized BRIM-3 study. *Annals of oncology : official journal of the European Society for Medical Oncology* 2017;**28**:2581–2587.
- 3 Hauschild A, Grob J-J, Demidov LV, Jouary T, Gutzmer R, Millward M, Rutkowski P, Blank CU, Miller WH, Kaempgen E, Martín-Algarra S, Karaszewska B, Mauch C, Chiarion-Sileni V, Martin A-M, Swann S, Haney P, Mirakhur B, Guckert ME, Goodman V, Chapman PB. Dabrafenib in BRAF-mutated metastatic melanoma: a multicentre, open-label, phase 3 randomised controlled trial. *The Lancet* 2012;**380**:358–365.

- 4 Ascierto PA, McArthur GA, Dréno B, Atkinson V, Liskay G, Di Giacomo AM, Mandalà M, Demidov L, Stroyakovskiy D, Thomas L, de la Cruz-Merino L, Dutriaux C, Garbe C, Yan Y, Wongchenko M, Chang I, Hsu JJ, Koralek DO, Rooney I, Ribas A, Larkin J. Cobimetinib combined with vemurafenib in advanced BRAFV600-mutant melanoma (coBRIM): updated efficacy results from a randomised, double-blind, phase 3 trial. *The Lancet Oncology* 2016;**17**:1248–1260.
- 5 Robert C, Grob JJ, Stroyakovskiy D, Karaszewska B, Hauschild A, Levchenko E, Chiarion Sileni V, Schachter J, Garbe C, Bondarenko I, Gogas H, Mandalà M, Haanen J, Lebbé C, Mackiewicz A, Rutkowski P, Nathan PD, Ribas A, Davies MA, Flaherty KT, Burgess P, Tan M, Gasal E, Voi M, Schadendorf D, Long GV. Five-Year Outcomes with Dabrafenib plus Trametinib in Metastatic Melanoma. *New England Journal of Medicine* 2019;**381**:626–636.
- 6 Dummer R, Ascierto PA, Gogas HJ, Arance A, Mandalà M, Liskay G, Garbe C, Schadendorf D, Krajsova I, Gutzmer R, Chiarion Sileni V, Dutriaux C, de Groot JWB, Yamazaki N, Loquai C, Moutouh-de Parseval LA, Pickard MD, Sandor V, Robert C, Flaherty KT. Overall survival in patients with BRAF-mutant melanoma receiving encorafenib plus binimetinib versus vemurafenib or encorafenib (COLUMBUS): a multicentre, open-label, randomised, phase 3 trial. *The Lancet Oncology* 2018;**19**:1315–1327.
- 7 Blank CU, Larkin J, Arance AM, Hauschild A, Queirolo P, Del Vecchio M, Ascierto PA, Krajsova I, Schachter J, Neyns B, Garbe C, Chiarion Sileni V, Mandalà M, Gogas H, Espinosa E, Hospers GAP, Miller WH, Robson S, Makrutzki M, Antic V, Brown MP. Open-label, multicentre safety study of vemurafenib in 3219 patients with BRAFV600 mutation-positive metastatic melanoma: 2-year follow-up data and long-term responders' analysis. *European Journal of Cancer* 2017;**79**:176–184.
- 8 Larkin J, Brown MP, Arance AM, Hauschild A, Queirolo P, Vecchio MD, Ascierto PA, Krajsová I, Schachter J, Neyns B, Garbe C, Sileni VC, Mandalà M, Gogas H, Espinosa E, Hospers G, Lorigan P, Nyakas M, Guminski A, Liskay G, Rutkowski P, Miller W, Donica M, Makrutzki M, Blank C. An open-label, multicentre safety study of vemurafenib in patients with BRAFV600-mutant metastatic melanoma: final analysis and a validated prognostic scoring system. *European Journal of Cancer* 2019;**107**:175–185.
- 9 Del Vecchio M, Ascierto PA, Mandalà M, Sileni VC, Maio M, Di Guardo L, Simeone E, Queirolo P. Vemurafenib in BRAFV600 mutated metastatic melanoma: a subanalysis of the Italian population of a global safety study. *Future Oncology* 2015;**11**:1355–1362.
- 10 Martin-Algarra S, Hinshelwood R, Mesnage S, Cebon J, Ferrucci PF, Aglietta M, Neyns B, Chiarion-Sileni V, Lindsay CR, Del Vecchio M, Linardou H, Merelli B, Tonini G, Atkinson V, Freivogel K, Stein D, Dalland L, Lau M, Legenne P, Queirolo P, Millward M. Effectiveness of dabrafenib in the treatment of patients with BRAF V600–mutated metastatic melanoma in a Named Patient Program. *Melanoma Research* 2019;**29**.[https://journals.lww.com/melanomaresearch/Fulltext/2019/10000/Effectiveness\\_of\\_dabrafenib\\_in\\_the\\_treatment\\_of.10.aspx](https://journals.lww.com/melanomaresearch/Fulltext/2019/10000/Effectiveness_of_dabrafenib_in_the_treatment_of.10.aspx)
- 11 Martín Algarra S, Soriano V, Fernández-Morales L, Berciano-Guerrero M-Á, Mujika K, Manzano JL, Puértolas Hernández T, Soria A, Rodríguez-Abreu D, Espinosa Arranz E, Medina Martínez J, Márquez-Rodas I, Rubió-Casadevall J, Ortega ME, Jurado García JM, Lecumberri

Biurrun MJ, Palacio I, Rodríguez de la Borbolla Artacho M, Altozano JP, Castellón Rubio VE, García A, Luna P, Ballesteros A, Fernández O, López Martín JA, Berrocal A, Arance A. Dabrafenib plus trametinib for compassionate use in metastatic melanoma: A STROBE-compliant retrospective observational postauthorization study. *Medicine* 2017;**96**:e9523–e9523.

- 12 Atkinson V, Sandhu S, Hospers G, Long GV, Aglietta M, Ferrucci PF, Tulyte S, Cappellini GCA, Soriano V, Ali S, Poprach A, Cesas A, Rodriguez-Abreu D, Lau M, de Jong E, Legenne P, Stein D, King B, van Thienen JV. Dabrafenib plus trametinib is effective in the treatment of BRAF V600-mutated metastatic melanoma patients: analysis of patients from the dabrafenib plus trametinib Named Patient Program (DESCRIBE II). *Melanoma Research* 9000;**Publish Ahead of Print**.[https://journals.lww.com/melanomaresearch/Fulltext/publishahead/Dabrafenib\\_plus\\_trametinib\\_is\\_effective\\_in\\_the.99116.aspx](https://journals.lww.com/melanomaresearch/Fulltext/publishahead/Dabrafenib_plus_trametinib_is_effective_in_the.99116.aspx)
